# Supplementary material
Source: PubMed Central journal article supplement (PMC4592818)
Supplement: NIHMS712788-supplement-1.pdf [file NIHMS712788-supplement-1.pdf]

## Supplemental Figure 1

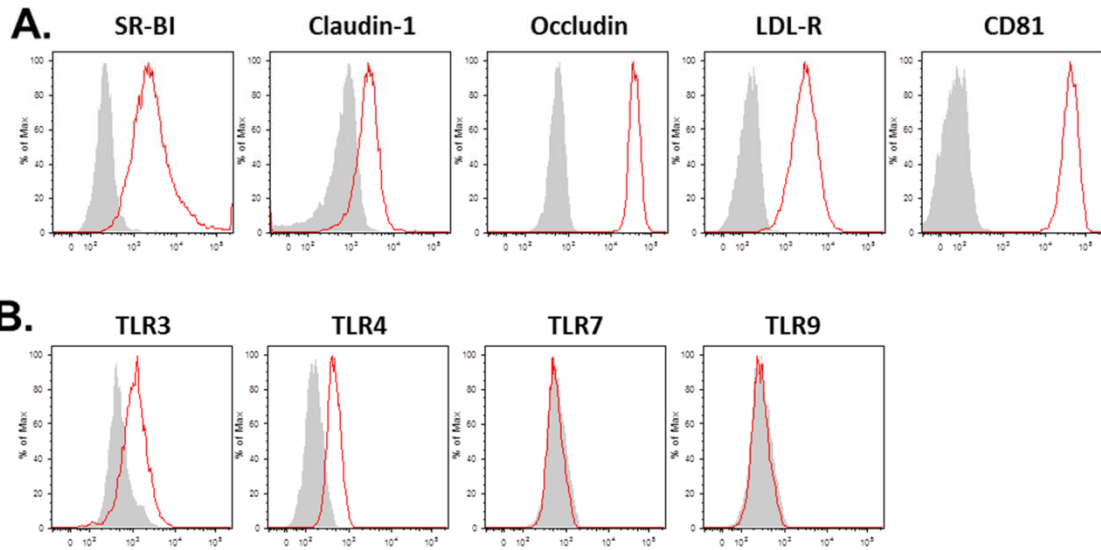

1

2

### 3 Supplemental Figure 1: Characterization of HTR8.

4 FACS analysis demonstrates that HTR8 express several receptors, involved in HCV binding and  
5 entry (A). HTR8 are positive for TLR3 and TLR4 (B). Shaded histograms represent isotype  
6 controls, n=3.

7

8

9

10

11

12

13

## Supplemental Figure 2

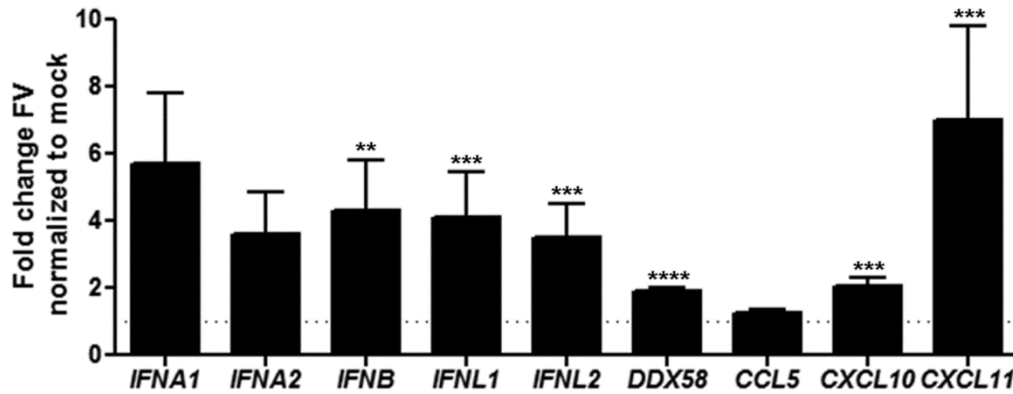

14

15

### 16 Supplemental Figure 2: Villous explants respond to exogenous T/F viral RNA.

17 Full-length genotype 1a HCV T/F vRNA was added exogenously to villous explants for 48  
18 hours. Gene up-regulation was assessed by real-time RT-PCR. Villous explants were dissected  
19 from early terminated pregnancy between 10 and 20 week gestation. Bars represent mean plus  
20 SEM, Wilcoxon signed-rank test (n=8). \* $p < 0.05$ , \*\* $p < 0.01$ , \*\*\* $p < 0.001$ , \*\*\*\* $p < 0.0001$ .

21

22

23

24

25

26

27

28

29

### Supplemental Figure 3

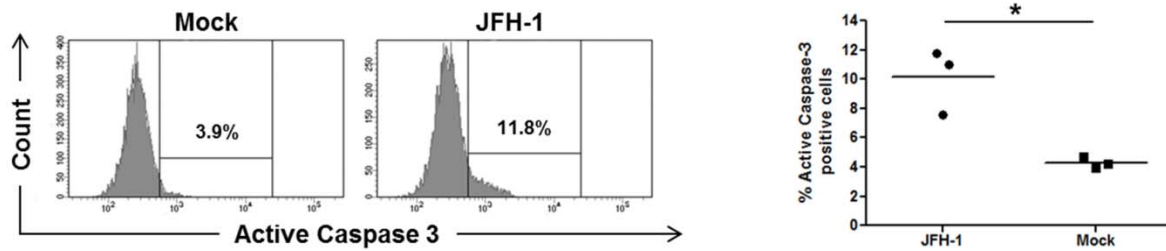

30

31

### 32 Supplemental Figure 3: HCV JFH-1 transfection induces apoptosis in EVT<sub>s</sub>.

33 HTR8 were transfected with JFH-1 RNA (or mock transfected) for 24 hours. Intracellular  
34 staining showed significant increase of caspase-3 activation compared to control. Lines represent  
35 mean, t test, \*p<0.05.

36
